# Supplementary material for: Androgen drives melanoma invasiveness and metastatic spread by inducing tumorigenic fucosylation
Source: PubMed Central journal article supplement (PMC10850104; doi:10.1038/s41467-024-45324-w), 2024-02-07
Supplement: 41467_2024_45324_MOESM3_ESM.pdf [file 41467_2024_45324_MOESM3_ESM.pdf]

### **Description of Additional Supplementary Files**

#### **Supplementary Data 1:**

Description: List of primers, key reagents/chemicals, commercial kits, and plasmids used in the study.

#### **Supplementary Data 2:**

Description: Matrixes of phosphoproteomics and fucoproteomics data after MaxQuant analysis and IRON or BBSR normalization.
